# Supplementary material
Source: publisher site journal article supplement (https://www.dovepress.com/article/311352)
Supplement: Supplementary file 1 [file get_supplementary_file.php]

**Additional File 1: Peer relationship scale (PRS) for Chinese community-dwelling elderly – Draft**

**Introduction**

“Peers” refer to friends/neighbors/relatives/old colleagues/old classmates/acquaintances of the same or similar age (The age difference is no more than ten years from you). Please do not include your parents, partners, or children, but you can include other relatives of the same age. “Acquaintance” means the person you recognize or know by sight, and if you meet him/her on the street, at least you will stop to speak or say hello to him/her. Please select the answer that best suits you for each of the following descriptions according to your actual situation (There is no right or wrong answer to these questions).

***** The draft of Peer relationship scale-Quantity (Please tick all the relevant boxes).

|  | | | | | | | | | | |
| --- | --- | --- | --- | --- | --- | --- | --- | --- | --- | --- |
| 1. If you were to list the names of intimate peers, how many people would you list?" | | | | | | | | | | |
| a. 0 | | b.1 | | c. 2-3 | | d. 4-9 | | e.10-19 | | f. ≥20 |
| 2. How many of the peers do you feel close to living with for an hour’s drive? | | | | | | | | | | |
| a. 0 | | b.1 | | c. 2-3 | | d. 4-9 | | e.10-19 | | f. ≥20 |
| 3. How many peers do you feel free with to share private matters? | | | | | | | | | | |
| a. 0 | | b.1 | | c. 2-3 | | d. 4-9 | | e.10-19 | | f. ≥20 |
| 4. If you were to list the names of peers available to help and support you, how many people would you list? | | | | | | | | | | |
| a. 0 | | b.1 | | c. 2-3 | | d. 4-9 | | e.10-19 | | f. ≥20 |
| 5. How many close peers have you known each other for more than three years? | | | | | | | | | | |
| a. 0 | | b.1 | | c. 2-3 | | d. 4-9 | | e.10-19 | | f. ≥20 |
| 6. How many acquaintances (of a similar age) do you recognize, know by sight, or greet with? | | | | | | | | | | |
| a. 0 | | b.1 | | c. 2-3 | | d. 4-9 | | e.10-19 | | f. ≥20 |
| 7. How many peers do you usually play with or participate in activities (square dancing, chess, shopping, volunteer activities, senior colleges, etc.)? | | | | | | | | | | |
| a. 0 | | b.1 | | c. 2-3 | | d. 4-9 | | e.10-19 | | f. ≥20 |
| 8. How often do you visit or see face-to-face with your close peers? | | | | | | | | | | |
| a. never | | b. less than once a year | | c.at least once a year | | d. at least once a month | | e. at least once a week | | f. nearly daily |
| 9. How often do you contact your close peers by phone or online (such as WeChat, QQ, etc.)? | | | | | | | | | | |
| a. never | | b. less than once a year | | c.at least once a year | | d. at least once a month | | e. at least once a week | | f. nearly daily |
| 10. How often do you see face-to-face with acquaintances (of a similar age) whom you recognize or know by sight or will greet you? | | | | | | | | | | |
| a. never | | b. less than once a year | | c.at least once a year | | d. at least once a month | | e. at least once a week | | f. nearly daily |
| 11. How often do you contact acquaintances (of a similar age) by phone or online (such as WeChat, QQ, etc.)? | | | | | | | | | | |
| a. never | b. less than once a year | | c.at least once a year | | d. at least once a month | | e. at least once a week | | f. nearly daily | |
| 12. How often do you participate in activities with peers (playing chess, playing cards, square dancing, shopping activities, etc.)? | | | | | | | | | | |
| a. never | b. less than once a year | | c.at least once a year | | d. at least once a month | | e. at least once a week | | f. nearly daily | |

***** The draft of Peer relationship scale-Quality (Please tick all the relevant boxes).

|  | Strongly Agree | Agree | Neutral/Do not know | Disagree | Strongly Disagree |
| --- | --- | --- | --- | --- | --- |
| 1. I'm popular with my peers. |  |  |  |  |  |
| 2. I'm good at making peer friends. |  |  |  |  |  |
| 3. On the whole, I am satisfied with the interactions with my peers. |  |  |  |  |  |
| 4.I feel cared about by my peers. |  |  |  |  |  |
| 5. I trust each other with peers. |  |  |  |  |  |
| 6. I feel some of my peers take advantage of me. |  |  |  |  |  |
| 9. My peers have similar views to me. |  |  |  |  |  |
| 10. I share hobbies or interests with my peers. |  |  |  |  |  |
| 11. I can see the advantages of my peers. |  |  |  |  |  |
| 12.I think my peers value the relationship with me. |  |  |  |  |  |
| 13. I feel happy with my peers. |  |  |  |  |  |
| 14. I feel close to my peers. |  |  |  |  |  |
| 15. I feel like I am an essential member of my peer group. |  |  |  |  |  |
| 16. I feel sad and alienated/isolated from other peers. |  |  |  |  |  |
| 17. I feel alone and friendless. |  |  |  |  |  |
| 18. I feel betrayed or treated unfairly by my peers. |  |  |  |  |  |
| 19. I have some peers to help me if I need help. |  |  |  |  |  |
| 20. I have some peers to care for or visit me if I'm sick. |  |  |  |  |  |
| 21. I have some peers to provide information or advice if I need it. |  |  |  |  |  |
| 22. I had peers to share my feelings or private matters. |  |  |  |  |  |
| 23. I have some peers to accompany or comfort me if I feel down. |  |  |  |  |  |
| 24. I would help my peers if they need help. |  |  |  |  |  |
| 25. I argued or quarreled with my peers. |  |  |  |  |  |
| 26. I am angry or hurt because peers deliberately embarrassed me or slandered me. |  |  |  |  |  |
| 27. I get invited to go out and do things with peers. |  |  |  |  |  |
| 28. My peers and I visit each other at home. |  |  |  |  |  |
| 29. I take the initiative to make new friends with peers. |  |  |  |  |  |
| 30. I take the initiative to maintain interpersonal relationships with my peers. |  |  |  |  |  |
